# Supplementary material for: Application of microdroplet PCR for large-scale targeted bisulfite sequencing
Source: HighWire-hosted journal article supplement (doi:10.1101/gr.116863.110), 2011-07-14
Supplement: Supplemental_Table_2.xlsx [file Supplemental_Table_2.xlsx]

## Sheet: Sheet1
Gene	Region	Primer1	Primer2	# Amplicon CpG	Amplicon Length
IL2	chr4:123596298-123596573	CTTCAAATATCTAACCCCAAACTCT	AATATATATTTGTGTGTTGGTGGGG	1	276
IL2	chr4:123597041-123597489	TATATTGTGGTAGGAGTTGAGGTTA	CTATTTACTCTTACTCTTATCCACCAC	1	449
IL2	chr4:123596771-123597065	AATGTGAGTATTTTGGTGAGTTTGG	TAACCTCAACTCCTACCACAATATA	0	295
IL2	chr4:123598060-123598289	TTTGGGGATATTTGAGGAGATTTTG	CCTACCTATACACTATTCTCTTTTCTC	0	230
IL2	chr4:123596295-123596554	TCACTTCAAATATCTAACCCCAAAC	GTGGGGGTGGGAAGAAAATAT	1	260
IL2	chr4:123596264-123596800	GAAAGTTAGGATATGGTAGAGTTGAG	AAATCCCAAACTCACCAAAATACTC	1	537
IL2	chr4:123597463-123598096	GTGGTGGATAAGAGTAAGAGTAAATAG	CTCTCTCTAAAACAAAATCTCCTCA	5	634
IL2	chr4:123595656-123596289	GTTGGAGTTGTATTATGTGGTTTTG	CTCAACTCTACCATATCCTAACTTTC	1	634
BUB1B	chr15:38241026-38241468	TATAACTCAACTCAACCACCTACTA	GAGGGTTGAGATTTTTGTGTTTGTA	5	443
BUB1B	chr15:38240135-38240577	GGTAGGAAATAGTTAGGTTAGTGGTT	ACCACCTCAAACCCACAC	27	443
BUB1B	chr15:38239517-38239956	AAGAATTAGAGGGTAGTGGATAGTA	CCAAAATATTACCTCTTTTCCCCTTC	3	440
BUB1B	chr15:38240693-38241132	GATTTGAGTTAGGAATGTAGGATGG	ATACTTTAAATTCCCCCAAAACCAC	20	440
BUB1B	chr15:38239839-38240255	CTACTCCCCTAATCACATCTAAACTA	GGGAGATGTTTTTGAGTGTTTGTAT	3	417
BUB1B	chr15:38240553-38240817	GTTAGGGGTGTGGGTTTGA	AAACCTTCTATTACCTACCAAACC	12	265
BUB1B	chr15:38241108-38241521	GTGGTTTTGGGGGAATTTAAAGTAT	TATCTTTATTATCTAACTCCCCCACC	3	414
BUB1B	chr15:38239210-38239532	GGGTTAAGTAGGGTGATTTTTAAGT	CTACCCTCTAATTCTTAATTCCCAAC	3	323
MELK	chr9:36563421-36563867	CACTACCTTTTCAAAATCCAAATCC	TGGTGGGAGTAATTTTGTTGTT	21	447
MELK	chr9:36562661-36563103	CAAAACCAAAACCTCAAATCACC	GAGAGTTAGGAGTAAATTGGGTTTG	51	443
MELK	chr9:36563079-36563474	CAAACCCAATTTACTCCTAACTCTC	ATTATTTTGGGGAGATGATAGGAGAG	17	396
MELK	chr9:36562422-36562622	GTGTTTGTAGTTTTAGTTATTGGGG	AATATACCAAATCTCCACAAAACCC	5	201
MELK	chr9:36563533-36563918	GTTTTTGTTGTTTAGGTTGGAGTG	AACCTTCCCTAAATCTACCCTTT	19	386
MELK	chr9:36561582-36561923	CTTTTCTCTCTCTCTTTCTCTCTTTC	GTATGGAGAAATTGTTAGGTTAGGTG	7	342
MELK	chr9:36562285-36562700	ATAACTCACNCCTATAATCCCAACAC	TTTATTGGGTTGNGAGGGGTGATTT	18	416
MELK	chr9:36561895-36562311	TTACACCTAACCTAACAATTTCTCC	AGTGTTGGGATTATAGGNGTGAGTTA	5	417
AIM2	chr1:157312517-157312926	CCCCCATCCTACTAATAAAAACAAA	GGATATTAGTTTTGAAAGGATGGGT	1	410
AIM2	chr1:157313219-157313631	TATTTTTAGGTTTAGTGTGGGTAGG	CTTTAAATACCTACACTCCTCCCTTA	3	413
AIM2	chr1:157312929-157313262	TTGTAGGTTTAGGTTTTTAGAGGTG	TAAAACTCCAATTATCACTCCTACC	5	334
AIM2	chr1:157313606-157313881	TAAGGGAGGAGTGTAGGTATTTAAAG	CTACTAACCCTTAACTTCATTATACCC	6	276
AIM2	chr1:157314028-157314456	CAATCCCTCTACTAACCTTTTTAACC	GTTGATTATTTGGGTATGGTTAGGT	2	429
AIM2	chr1:157312497-157312870	ATAATAAAACCATCCAAATACCCCC	TTTTGGTGTTTTTGAGTTGGTG	1	374
AIM2	chr1:157312902-157313213	ACCCATCCTTTCAAAACTAATATCC	GTGTTTATTAGGGGTATATGTGAAG	5	312
AIM2	chr1:157311974-157312541	CACACACACACACACACATATATAT	TTTGTTTTTATTAGTAGGATGGGGG	1	568
AIM2	chr1:157313855-157314430	GGGTATAATGAAGTTAAGGGTTAGTAG	TACTCTTCCTCTACTCCTTAAACATC	4	576
BRCA1	chr17:38530183-38530632	ATTCTTAAATTCTCCCTCCCACAAA	TTGAGGATTAGGAAGGGGGTA	19	450
BRCA1	chr17:38531170-38531619	TCTAACCTCTACTCTTCCAATTAC	GTTGGATGGGAATTGTAGTTTT	15	450
BRCA1	chr17:38530659-38531101	CCCCCTCCCCAAAATTCAC	GGGGGTAGATTGGGTGG	23	443
BRCA1	chr17:38531612-38532020	TTTAGTTTTAGGAGTTTGGGGTAAG	CTAACTAACCCAAACTACTTCCTTAC	24	409
BRCA1	chr17:38530029-38530263	CAACACCAATCAAAACCTCCC	GATTTTGTGGAAGAAGAGGTGT	5	235
BRCA1	chr17:38530804-38531181	AAACTCTACTACCTTTACCCAAAAC	GTAGAGGTTAGAGGGTAGGTATTTTA	18	378
BRCA1	chr17:38529883-38530094	AACCCCTTAAATCTTTTCCTTTCTC	GAGGATTTAGAGATGAGAGTAGGTTA	3	212
BRCA1	chr17:38530508-38530831	CTAAAACTCCTAACCTCATAACCAAC	TTTGTTTTGGGTAAAGGTAGTAGAG	14	324
IL1A	chr2:113259606-113260046	CCCCTATAATCCCAACTATTCAAAA	GGTAAGTAGAAATGTAGTTAGTTGG	1	441
IL1A	chr2:113258951-113259399	GATTGTGTTTTAGGGTGAATTGGTAG	TTCCTTTCTCCCAATCTCCATT	2	449
IL1A	chr2:113258408-113258853	GAGAAGGTAATGTGAGAGAAAATAG	TTTCTCCCTTCCTCCTAAAAACTTA	10	446
IL1A	chr2:113260018-113260439	CCAACCAACTAACTACATTTCTACT	AGGATAGGTATTGTTTATGTTGGTG	0	422
IL1A	chr2:113259353-113259654	TTAGAAGTTAGTGGTTAAGTTTGGG	CCTCAAATAATTATCCTACCTCAACC	0	302
IL1A	chr2:113258826-113259123	TATTAAGTTTTTAGGAGGAAGGGAG	ATACCACTATTCTCTTCTCTACCCTA	2	298
IL1A	chr2:113260087-113260468	TAACCCTCTCCTCCTAAAAATCTTA	ATTTATAATAGAGGAGTGAGGATGGG	0	382
PSAT1	chr9:80102226-80102675	CTACCCCTAACCCTAACTACTAATAC	TAGGTTTTATGGGGGATAAGGAG	26	450
PSAT1	chr9:80100943-80101391	GTGGAAAAGTTTGAGTAGTTTTGG	ATCTACCAAACTTTTCTAAACACCC	22	449
PSAT1	chr9:80101571-80101982	AAGGTAGGTTGGTAGGGGTA	AAACCCAAAATTAACCACCTACCTA	43	412
PSAT1	chr9:80101956-80102251	CCCCCAAACAAATAATCAACTT	GTATTAGTAGTTAGGGTTAGGGGTAG	25	296
PSAT1	chr9:80102664-80102883	CCATAAAACCTACCCTTTCCTAAA	GTTTGGGAAGGTAGAGAGTGA	5	220
PSAT1	chr9:80101379-80101596	AAGTTTGGTAGATTAGTGATTGGTG	AAAAACTACCCCTACCAACCTAC	4	218
PSAT1	chr9:80100676-80101001	CCAAAATCCTATCCAATTACAAACC	AGAAGGTGGTTTTTAGTTAGGTTAG	4	326
CDC2	chr10:62208746-62209081	GGGGTGGGAAAGTGGGAT	CCTAAATTTTTCTAACACCCATCAC	8	336
CDC2	chr10:62208150-62208535	GTAGTTGGGTTTTGATTGGTTGTT	CTCCCTCTAAAACCAACCCAATATAA	30	386
CDC2	chr10:62207548-62207855	CCAATCTCTAAATACATACCTCTCTC	AGGGTTAGGAGTGTATAGTTATGTT	4	308
CDC2	chr10:62207831-62208100	AACATAACTATACACTCCTAACCCT	GGTTAGAGAAAAAGTAGGAGGG	12	270
CDC2	chr10:62208507-62208763	GAGTTATATTGGGTTGGTTTTAGAGG	ATCCCACTTTCCCACCCC	16	257
CDC2	chr10:62207323-62207525	AAGGATATGATGGATGGTAATGAAG	CTAACCTCCAAATCCTAAACTCAAA	5	203
CDC2	chr10:62207936-62208180	TGAATTGTGTTAATGTTGGGAG	CTTTCAAAACAACCAATCAAAACCC	15	245
CDC2	chr10:62207380-62207813	CATAATTTAAACCTCTTTCTCTCCCC	TGNGGGTTGGTTTTAAGGAGTATATT	9	434
CDC2	chr10:62209057-62209730	GTGATGGGTGTTAGAAAAATTTAGG	TTCCATCCTTCTTAACTCCTAAAAC	8	674
TNFRSF9	chr1:7923463-7923871	CCACTCCTTAATCTTCAAACTTCTAC	GTATTATAGTGATTATGGAGTTAGGGG	8	409
TNFRSF9	chr1:7922927-7923374	GGTTTGTTAAAGTTTGAGGGTGTAT	TTACTCCCTTTACCCATTTCTAAAC	0	448
TNFRSF9	chr1:7923993-7924360	TTATGTAAATGAGGAAAGTGGGGTT	TCAAACTCCTAACCTCAAATAATCC	10	368
TNFRSF9	chr1:7924333-7924636	GATGGATTATTTGAGGTTAGGAGTT	TATACTCCTCCTCTCCTCTTACTATA	4	304
TNFRSF9	chr1:7923125-7923488	AAACTATCACATAATCACTCTTCCC	GTAGAAGTTTGAAGATTAAGGAGTGG	1	364
TNFRSF9	chr1:7922920-7923254	TTGTGTNGGTTTGTTAAAGTTTGAGG	CCATACAAACTTCACATCTCAAAAC	1	335
TNFRSF9	chr1:7923833-7924088	ACCATATACNATCCCCTAACTCCATA	AGGGATTAGGTNGATTTGGGTTTTAA	6	256
TNFRSF9	chr1:7922344-7922951	GAGAAAGTTAAGGTATAAGAGGTTG	ATACACCCTCAAACTTTAACAAACC	4	608
CCL3	chr17:31440837-31441280	GGAAGGTAGGTTTGTTTAGATTAAGTG	AAATCTTAACCCCCTAATCTCCAAA	3	444
CCL3	chr17:31441447-31441869	GATGTAGAGAATTGGTTGTAGAGAG	AATTAACATATACCCCTCTTCACAC	5	423
CCL3	chr17:31441843-31442196	GAGTGTGAAGAGGGGTATATGTTA	CACCTAACATATTAACACCCACC	2	354
CCL3	chr17:31440565-31440946	AATAACCTTCTAACCTATCTCTACCC	TATGAAGAGTTAAGGAGAAAGAAGG	8	382
CCL3	chr17:31441089-31441471	GGATAGAGTTTTTGGGAGATTTAGAG	CTCTCTACAACCAATTCTCTACATC	4	383
CCL3	chr17:31442002-31442201	GATGTTGTGGAGGGTTGTATAATTT	CTAAACACCTAACATATTAACACCC	2	200
CCL3	chr17:31442063-31442679	GGAGGAATAGAAAGTATGAGGTTATG	TAAATCACCCAAAAACCTATCACAC	4	617
IL12RB2	chr1:67545294-67545660	GATTAGTTTGGGTAATAGAGTGAGAG	CAAATATCCTTTCTCTATACTCTACACC	9	367
IL12RB2	chr1:67544923-67545317	TGTATTGGGTTTAGTGGATTAGAAG	CTCACTCTATTACCCAAACTAATCTC	5	395
IL12RB2	chr1:67546263-67546480	GGGGATAGAGAGAGTTTTAGGA	CCCAATACCTCCAAATAAACATCTA	14	218
IL12RB2	chr1:67546456-67546695	TAGATGTTTATTTGGAGGTATTGGG	CCCCCAATATCTTACTCACATTTAA	9	240
IL12RB2	chr1:67545862-67546297	CTTACTCAAAACNACACAACAAAACC	TTGGTTNGGGATTTTGGGGTTTTT	54	436
IL12RB2	chr1:67545546-67545887	TCCAATATATTCTACCCNCACTCCAA	GGTTTTGTTGTGTNGTTTTGAGTAAG	17	342
IL12RB2	chr1:67544867-67545268	AGGTAATGTTTAGAAGNGTGGTATGT	TCCCNCCTTAACTTCCCAAAATACAA	7	402
IFNG	chr12:66839991-66840346	CCATTATACCCACCTATACCATTCTA	TTGGGTAGTGTTGATTTAGAGT	3	356
IFNG	chr12:66839586-66839900	GGGTTTTGGTAGTAATAGTTAAGAG	AACTATCATCCCTACCTATCTATCAC	4	315
IFNG	chr12:66839784-66840016	CAATATACTACACCTCCTCTAACTAC	TAGAATGGTATAGGTGGGTATAATGG	2	233
IFNG	chr12:66840246-66840645	GNGGTTAAAAGAATAATTTGGTGAGGAAG	TAACCTTATAATCCACCCNCCTCAAC	3	400
IFNG	chr12:66838647-66839275	AAACCACCCCACTATAAAATACTAC	GTGGTGGGAATTTATTTAGTTGTGA	4	629
IFNG	chr12:66839251-66839802	TCACAACTAAATAAATTCCCACCAC	GAGGAGGTGTAGTATATTGTTTTGA	4	552
IFNG	chr12:66840586-66841196	CAATAACTCACACCTATAATCCCAA	TAGGTAGAAATGTAAAGTGGGTTTG	8	611
GGH	chr8:64114251-64114681	AAACTAAACTAACCAACCCAAATCC	GTGGATAGGTTTAGTGGTGGT	33	431
GGH	chr8:64113280-64113564	CAACCACTATTATCCTCTACTACTAAAC	TATATGATTTTTAAAGGTGGGAGGG	3	285
GGH	chr8:64114681-64115048	GGGGTAGAAAAGATGATTGGTTTTT	CACATCCTTTATTACTTACCTCTCAC	5	368
GGH	chr8:64114051-64114271	GTGGGAGGTTTTGGGAGTG	ACCTAAATTAACCAACCCAACT	24	221
GGH	chr8:64113540-64113744	CCCTCCCACCTTTAAAAATCATATA	GGGGAGGAGTTGGGTGT	15	205
GGH	chr8:64113279-64113540	TCAACCACTATTATCCTCTACTACT	GAGGAGGGTGTATTATGAAGAATTT	3	262
GGH	chr8:64113841-64114265	ATAACAAACCCAACACNCACAACAAA	TGGTTAGTTTAGTTTTGTANGGGTGA	52	425
GGH	chr8:64113614-64113863	CCTAAATAATACCCAACCCNAATTCC	GTTGTGNGTGTTGGGTTTGTTATTTT	24	250
GGH	chr8:64112657-64113303	TCATCTTTCAATCCTTTACACTTCC	AGTAGTAGAGGATAATAGTGGTTGA	5	647
IGF2	chr11:2119533-2119978	TGTGGTTTTAGGGAAAGGTTTT	CTACCCTAAATCCCCCTACATT	2	446
IGF2	chr11:2118839-2119285	GGGAGATTGGGGGTAATGTT	AACCCCTATTTAAAACCTCTTTCTC	25	447
IGF2	chr11:2117856-2118221	GAATTTGGGTTAGGTTTGGAGT	CCCCTTCCCCTTAACTAAACTTA	22	366
IGF2	chr11:2119224-2119627	GGGATGAGAGAAGTTGTTTTATGTA	CCCAAATATACTAATCACACTCCAA	4	404
IGF2	chr11:2118820-2119248	GGATAATGTTTAAATTTGGGGGAGA	TACATAAAACAACTTCTCTCATCCC	25	429
IGF2	chr11:2118151-2118430	AAATCAAAAACCACNCACAAAATCCC	GAAAGNGGTTGGAGGGTTTTAAAGT	33	280
IGF2	chr11:2118405-2118798	CACTTTAAAACCCTCCAACCNCTTTC	GTTGTTTTNGGATATTGAGGATTGGT	48	394
IGF2	chr11:2118769-2118995	GGGTTAGTTTTTAGTGTTNGGGAGTA	CTCTATCTCCTACNAAATCCCCAAAA	15	227
PPIL5	chr14:49134325-49134735	CCCAAACTAATCTTAAACTCCTAAACTC	GTTTGGGGAGTAAATGTTAAGTAGG	18	411
PPIL5	chr14:49135676-49136031	GTGAAGTGGGTAGGTTTTGT	TACTATTCCCCAACTAAACAACTAC	18	356
PPIL5	chr14:49135368-49135701	GTTTAATAGGTAGGTAGATTAGTGGG	AAACTAACAAAACCTACCCACTTC	25	334
PPIL5	chr14:49134839-49135083	CAATTAAACCAATCACACTCCATC	GGGAAGGTAGGTGTGTTTTTG	12	245
PPIL5	chr14:49134711-49134933	CCTACTTAACATTTACTCCCCAAAC	GGGGGTTTTATATGGTTGTATTTGA	8	223
PPIL5	chr14:49133869-49134263	TTTTCCTAACTCCCAACTATACCTA	GTGTTTGTAGTTTTAGTTATTGGGG	9	395
PPIL5	chr14:49135287-49135520	GGTTTTGTTAAGGGAGAAGGG	CTAATCACCTCCACCTCACAATATAA	19	234
PPIL5	chr14:49135781-49136092	CTTAAAAATTCCTAAACTCCCAACC	TTTAAGTTAGGGAGAATATTGTGGG	9	312
PPIL5	chr14:49134843-49135085	TAAACCAATCACACTCCATCCAC	GAGGGAAGGTAGGTGTGTTT	13	243
PPIL5	chr14:49136068-49136404	CCCACAATATTCTCCCTAACTTAAA	GGTTTAGTTTTAGTTNGTTTGGAGGG	50	337
PPIL5	chr14:49134944-49135304	AGGTGTGTTTTNGGAGAGTAGTTATT	TTCTCCCTTAACAAAACCNAATTCTC	38	361
PPIL5	chr14:49134192-49134391	AAACCTCTCNACCTCCCCAAA	ATTTTAGTATTTTGNGGGGTTGAGGT	7	200
IL17A	chr6:52158468-52158916	CAATCTCTATCCCCATTTTCAATTC	GTTGAGTAGAGTTGTTATGTTATGGG	2	449
IL17A	chr6:52159293-52159702	GGGTTTTGATTATGGAGATTTAGGA	ACCCCACTTATTCTAAAACACA	3	410
IL17A	chr6:52158167-52158537	ATGGGATATTAGTTGAGTGTTTGAG	ATATTCCAACCCTACATACTACCAA	2	371
IL17A	chr6:52159681-52159974	TGTGTTTTAGAATAAGTGGGGT	CTACACCATTATTCTCAATCCCATA	2	294
IL17A	chr6:52158892-52159177	CCATAACATAACAACTCTACTCAACTTC	AATTAATTGGGGATGGATGAGTTTG	6	286
IL17A	chr6:52159950-52160393	TATGGGATTGAGAATAATGGTGTAG	CTATAACCTCCAAACTCAACAACAA	0	444
IL17A	chr6:52157937-52158292	CTTTTACTCATCTATCCTCCAATTCC	ATATAGAGGATTAGGATAAGGAAGGG	3	356
IL17A	chr6:52159284-52159702	TGAAANGTTGGGTTTTGATTATGGAG	ACCCCACTTATTCTAAAACACA	4	419
IL17A	chr6:52158723-52159317	TTTGGTTAAGGAATTTGTGAGG	TCCTAAATCTCCATAATCAAAACCC	11	595
IRF8	chr16:84489300-84489706	ACAACCCCCATATATAATTCTCTAC	GGGGTAGGAGAATTTTAGTTTTAAAGG	17	407
IRF8	chr16:84490767-84491216	GAAGGAGGGGATAGATTGTTTTTAA	CCAACCTTCCTCAAATAACTAAATC	3	450
IRF8	chr16:84490496-84490695	CACCTAAATCCAATCTAAATACCCA	GGTAGAATTTTAGTGGGATGATAGAG	6	200
IRF8	chr16:84489449-84489813	CTCTCCCCCACTTCATTTTTAC	GTTGGATATTGGGTAGTGATGTT	25	365
IRF8	chr16:84490670-84491085	CTCTATCATCCCACTAAAATTCTACC	GGTTATTGGTTGGGGAGATTTTT	4	416
IRF8	chr16:84491187-84491452	GGAGTGATTTAGTTATTTGAGGAAGG	CTATTAACCAAACCCTATCTACAACC	5	266
IRF8	chr16:84488913-84489324	CTAATTTCTAAAAACTCCATCCCAC	GTAGAGAATTATATATGGGGGTTGT	5	412
IRF8	chr16:84489788-84490107	ACNAACATCACTACCCAATATCCAAC	GGTAGTGGGGTTNGGGTTTTT	32	320
IRF8	chr16:84490036-84490483	CCNCCCCTAAACCCCAAATATAAAAA	GTAAAAAGTAGAGAGGGATANGGGTG	55	448
IRF8	chr16:84490446-84490699	CAACTCAATAACCACCCNTATCCCTC	ANGTGGTAGAATTTTAGTGGGATGAT	8	254
EZH2	chr7:148211356-148211776	CCCTCCAAAAACACAATCAATA	GGGATAGATATAAGTTGGTGGG	53	421
EZH2	chr7:148212779-148213059	GGGTGTTGGAAGTTAAGTTTGA	ATTACACTCCAACCTAAACAACCA	33	281
EZH2	chr7:148212012-148212282	AAAAACTCTCCCCTCACCC	GGGATTTAGAAGGTAGTGGAGTTT	48	271
EZH2	chr7:148213108-148213429	ATTCTCATACCTCAACCTCCC	GAAGGGTTTGAAATGGTAGTAATGT	20	322
EZH2	chr7:148211749-148212030	CTAAATCCCACCAACTTATATCTATCC	GGGTGAGGGGAGAGTTTTT	27	282
EZH2	chr7:148211042-148211422	ATTTTAATCACCTACTTCTACCACC	GGTTTTATGTTAAGTTTGAGGGAAG	12	381
EZH2	chr7:148212018-148212283	TCTCCCCTCACCCTCCA	TGGGATTTAGAAGGTAGTGGAG	48	266
EZH2	chr7:148213028-148213377	TTTNGTTTTGGTTGTTTAGGTTGGAG	ATAAACACTACAAACTCNACCAACCA	26	350
EZH2	chr7:148212597-148212823	TTTTTAGGAAGGNGGTGTGTAGGTA	CCACCCCCNAATTTTAAACTAATTCA	29	227
EZH2	chr7:148211938-148212290	ACTCCAAAAATATACNCTACCTCACTC	TATTNGGTGGGATTTAGAAGGTAGTG	55	353
EZH2	chr7:148212094-148212621	GTATAGTAGTGGNGGGGAGGTTTT	TACCTACACACCNCCTTCCTAAAAA	87	528
IL2RB	chr22:35876275-35876715	TAAACTTCACACAAACAAATCCCTC	TTGGAGGGGTGGGGATT	5	441
IL2RB	chr22:35875332-35875781	CTTCTATCCCCACTTACTCCAC	GTGGATTAGTTAGAGGGTTGGG	7	450
IL2RB	chr22:35875760-35876199	CCCAACCCTCTAACTAATCCAC	TGATGTAGGAGGGGAGAGAG	13	440
IL2RB	chr22:35874898-35875279	AACTCAATAAAACCTATATCCCCTC	GTTTTAGGTTGGAGGTAGAGTTTT	5	382
IL2RB	chr22:35875885-35876308	CCAAAACCCTACTAAACTCTAACTAC	GGTTATTTAGAGGGATTTGTTTGTG	10	424
IL2RB	chr22:35876362-35876770	ATTTCACCCAACCTTCCAAAAA	ATTGAATTTATGGAAATGGGAAGGG	3	409
IL2RB	chr22:35875137-35875537	GGAGAGAGTATGAGTTTTAGGTAGTT	TCCCTAAACTCTATATACTAAACCCC	8	401
IL2RB	chr22:35876743-35877189	CTACCCTTCCCATTTCCATAAATT	NGTATATTGTTGGTGGGAATGTA	1	447
PRMT5	chr14:22468691-22469122	CCCATAAAACCCTACAATATAACCT	AGGAAGTAGTAGTTGAGTTAGTAGT	15	432
PRMT5	chr14:22467544-22467982	CTACCCCTTCCTAACAACAATAAATC	GTATGGGTAGAATTGGGGTAAATTT	7	439
PRMT5	chr14:22468304-22468715	CCTACTTAACCACAACCCCTAATATA	AGGTTATATTGTAGGGTTTTATGGG	26	412
PRMT5	chr14:22467958-22468337	AAATTTACCCCAATTCTACCCATAC	ATAGTTGATATATTAGGGGTTGTGG	14	380
PRMT5	chr14:22469235-22469505	GTAGTTATGAAATTGGTTGGTATGG	CTAAACATCACCCCCTACTTTAC	6	271
PRMT5	chr14:22468931-22469342	GGTTGGGTTATGTAGTTATGTAATG	TACCTCCCTATATCTTTCCTTACTTC	3	412
PRMT5	chr14:22467382-22467658	GGGATAGTTTGATGTAGAATAGAGAAG	TTTCCTCTACATACCTATCTTCCATC	6	277
KCNH5	chr14:62638905-62639354	ATAATCATCTCAAAAACCACAACCC	TATGAGATAGTGTTGGTTTGGAGAA	3	450
KCNH5	chr14:62638024-62638322	TTTTTGGGTAGGAAATGAGATGTAG	CACCAACAAAATCCAACACATA	5	299
KCNH5	chr14:62638427-62638691	AAATCCAAACCATCCTAACTAACAC	GGTGGAATTAGAAAGAGATGAAGAT	12	265
KCNH5	chr14:62638667-62638937	ATCTTCATCTCTTTCTAATTCCACC	GATATAAAGGGTTGTGGTTTTTGAG	1	271
KCNH5	chr14:62637247-62637492	CATTATAACCCTTCTACCCACAAAA	TGAAGTGGTGTGTTTTTGAGAA	0	246
KCNH5	chr14:62638304-62638536	GTGTTGGATTTTGTTGGTGTTT	ATATCTAAATCTACAAACACCCACC	11	233
KCNH5	chr14:62637949-62638391	CCNCCCAACTACCTACTCAAACTATT	AGTGTTGGGATTATAGGNGTGAGTTA	10	443
KCNH5	chr14:62637443-62638054	GGTTAGGGGAGAGATAGAAATTTGTA	TTACTACTACATCTCATTTCCTACCC	3	612
VEPH1	chr3:158703621-158704001	CTACATAATCAACCAACCCCTAAAA	GTTTGGGAGAGAGAAGAAAAGTTAT	4	381
VEPH1	chr3:158703993-158704436	CTCCCAAACTTCTACTTAAACCTAAC	GAGTGGATGTAAGAAGGAATTATGAG	2	444
VEPH1	chr3:158703310-158703662	ATAACCCTATTCAACCCACTAACTA	GAATGGAGTTGAGAAATTTTTAGGG	3	353
VEPH1	chr3:158704530-158704947	CCTCATCTCTCTCTCTCTTTTAAAA	AAGTAGAGTAAGTGAATGTTGAGTG	3	418
VEPH1	chr3:158704191-158704607	AGTAGGTATTAGGAAAAAGGTTTGG	AATCCACTAAACACCACCAATT	2	417
VEPH1	chr3:158702599-158703334	CACTTCACTTCTACTAAAAACCTCT	TAGTTAGTGGGTTGAATAGGGTTAT	3	736
DDX4	chr5:55069852-55070296	GGTTTGAGGTTTGTAGAGGAGG	CCATATCCCCAACAAAACTTAAACT	14	445
DDX4	chr5:55069228-55069677	GAGTATTAAAGAGGTTAAGTAGGGAG	ACTTACTCTCCCAAACCCTC	26	450
DDX4	chr5:55068687-55069125	TTTCCTTCCAAAATAATAAACCCCC	GGTTTATGGAGGAGGTGTATTTTT	16	439
DDX4	chr5:55070230-55070577	TTTGAGGGAGGAGATAAAGTTTATG	ATTTCTACTTCCCAATCTTCATCTC	1	348
DDX4	chr5:55069658-55069867	GAGGGTTTGGGAGAGTAAGT	CTACAAACCTCAAACCCAAACT	12	210
DDX4	chr5:55068913-55069240	GGTTTTATTATGTTGGTTAGGTTGG	CTCTTTAATACTCTCTCCCCTTTTAC	11	328
DDX4	chr5:55068569-55068855	ACCCTTAACCACTTTAACTAATACC	GTTATTTAGGAGGTTGAGGTAAGAG	6	287
DDX4	chr5:55070553-55070918	GAGATGAAGATTGGGAAGTAGAAAT	TCACTAATATCAACCACATTTACCC	2	366
LYZL2	chr10:30958055-30958478	CATAATAACCCACACCTATAATCTC	GGTAGGTTTTTGAAGGATGTAGAAT	1	424
LYZL2	chr10:30958457-30958857	CTACATCCTTCAAAAACCTACCATT	GAGGTATTAAGGTTTAGAAGAGAGTTAG	6	401
LYZL2	chr10:30957483-30957925	ATATAATAGTTTTGTTGGGATGGGG	CTATACAACCTCTAACACAACTACTC	7	443
LYZL2	chr10:30957892-30958202	GTAGAGTTGAGTAGTTGTGTTAGAG	CACACACCACTATACCTAACTAATT	2	311
LYZL2	chr10:30958683-30958913	CCTTTCCTAACTCAAAAACCTTTCT	GTTTTGGTTAAGTTGTGTAGTGAG	2	231
LYZL2	chr10:30958683-30958937	CCTTTCCTAACTCAAAAACCTTTCT	GAAGAGTTTTTATTTGGANGGGAGGT	3	255
LYZL2	chr10:30958807-30959642	GTTTGTGTTTTGAAGTAGGTGT	CCTTAACCCAACAATTCAATTTCC	2	836
LYZL2	chr10:30958890-30959932	CTCACTACACAACTTAACCAAAAC	GAGTTTTAGTTTGGATAATAGAGGGAG	3	1043
INS	chr11:2138079-2138520	CCAAAACCTATCCCCAACATC	GGGTAGAAGGGGGTAGGAG	15	442
INS	chr11:2138893-2139337	CCTCCCTACTACAAAACTAAAACCTA	GTTTAATGTGGAAAGTGGTTTAGGT	8	445
INS	chr11:2138508-2138915	CCCCCTTCTACCCATACTAAATAAAA	GTTTTAGTTTTGTAGTAGGGAGGAT	12	408
INS	chr11:2139805-2140080	GTTATGGATGGGTTAAGGTGGT	AAACTAAACCAATACACAACTTCCC	3	276
INS	chr11:2137855-2138163	GGATATAGGAGGATATAGTTAGGGAG	CTACCTAAATAAACCAAACCCCTATC	10	309
INS	chr11:2139198-2139397	TCAACACCTCTTCCTCAAAAC	GGATAGGGGTTTGGGGATAGTA	4	200
INS	chr11:2139365-2139805	ACTCTTTACNCTACTATCCCCAAACC	GTATTTTGGGTTATTNGGGATTGGG	4	441
UBE3A	chr15:23234556-23234990	CCACCAAAAACCTACTTCTAACA	TTTGTAGTTTTTGGTAGGAGGGTT	57	435
UBE3A	chr15:23235443-23235836	GTTATTGGGAAGAGGAGGTGG	TCCTCTAAAATCTAACCTACACTCTC	15	394
UBE3A	chr15:23234221-23234585	ACAACCCTTAAACTTAACATACCAC	GGGTTGGTGTTAGAAGTAGGTTT	24	365
UBE3A	chr15:23235811-23236134	GAGAGTGTAGGTTAGATTTTAGAGGA	TAAAACTATACACACACACACACAC	6	324
UBE3A	chr15:23235967-23236345	GGTTGATTTTAGTTGGATAGAGGTT	CCTAAACCTAACATAACAAAACACC	2	379
UBE3A	chr15:23234567-23234992	CTACTTCTAACACCAACCCCTT	GGTTTGTAGTTTTTGGTAGGAGG	58	426
UBE3A	chr15:23235441-23235801	GGGTTATTGGGAAGAGGAGG	CTACAACATCTACAAAAACAACTCC	14	361
UBE3A	chr15:23234964-23235209	AAAAACCCTCCTACCAAAAACTAC	TTGGGTTNGGGGTGATTATAGGAG	34	246
UBE3A	chr15:23235188-23235600	CCTATAATCACCCCNAACCCAAC	GTGTTTAGAGGGTTTTNGGAAGTTTT	48	413
TMSB10	chr2:84986598-84986928	TAACCCCCAAACCCAAATCAAA	GATTTAGAAGGAAGTTTGGGGTT	15	331
TMSB10	chr2:84986979-84987371	ATAAAAATTACAACTCCCCTCCAAC	GGGTTTTGTTGTAGTGGTATTGTTT	18	393
TMSB10	chr2:84985179-84985563	TTAAAATATCACCACCAAATCCCAC	GTATTGTGTGAAGGGTTGTGG	12	385
TMSB10	chr2:84985543-84985793	CCACAACCCTTCACACAATAC	TTTTTAGGGAGGTTGAGTTTTAAGG	13	251
TMSB10	chr2:84985768-84985971	ACCTTAAAACTCAACCTCCCTAA	TGGGAGGGTGTGTGGT	10	204
TMSB10	chr2:84986906-84987175	AACCCCAAACTTCCTTCTAAATC	GGAGTGTTTAGGTTTATAGTGTAGT	14	270
TMSB10	chr2:84986597-84986815	CTAACCCCCAAACCCAAATC	TTTGTAAGGAAGAGTAGGGTGAG	9	219
TMSB10	chr2:84986208-84986634	AATACCAACACCNCCCCTACTAC	GGGTAAATTAAGGNGTTTGATTTGGG	55	427
TMSB10	chr2:84985922-84986230	CCACNACTACACATCATATCTACACA	GTAGTAGGGGNGGTGTTGGTATT	29	309
ENSG00000113141	chr5:139992323-139992771	GTGTAAGTTTTGTGGTTTTTAGAGG	TAAACCTCTACTCTCTCCCCAAAA	38	449
ENSG00000113141	chr5:139993242-139993682	ATCCTCAATACCTTAAACCAATACC	GAGGTTGAGGTAGAGAATTGTTTG	2	441
ENSG00000113141	chr5:139991870-139992268	CAATCCTTTAAACACCTATTCCAAC	GAGTTGTAGTAGTGGTTTAAGTTAGG	28	399
ENSG00000113141	chr5:139992748-139993144	TTTTGGGGAGAGAGTAGAGGTTTA	AAACACAAAACCCTAAATACCCTAC	13	397
ENSG00000113141	chr5:139993601-139994042	TAGGTTGGAGTAGAGTGTTATGATT	CCCTTCCTTCCTAAAACACAAAAAT	7	442
ENSG00000113141	chr5:139993051-139993285	CCCCCTTCCTTTCCTAAAAATATTAC	GTTGGATAGTGTAGAGTATGGTATTG	4	235
ENSG00000113141	chr5:139992243-139992599	CCTAACTTAAACCACTACTACAACTC	GTTTGTAGTAGAGGTGGAGATTTATG	33	357
RBM26	chr13:78876905-78877354	CCCCCTCATAATCACTTTTACA	ATGTAATAGGTGTTGAGGTGGTTAG	9	450
RBM26	chr13:78877357-78877787	AATTAGTGAAGAGAGGTGTAGATGAG	ACCCAAAAATCTATACAATTTCCCC	19	431
RBM26	chr13:78877850-78878269	GAGTTTTGTTGAGTTAGGATTTGAG	TAACCAACAAACACCTAATCCC	41	420
RBM26	chr13:78878345-78878762	ACTCCCAACACCCCCAA	GTAGGGTATTTAGGTAAATTGAGGAG	33	418
RBM26	chr13:78878737-78878983	CTCCTCAATTTACCTAAATACCCTAC	TATTTTTAGTTGGGGGAAAGTGTAG	3	247
RBM26	chr13:78877793-78878195	CCTATCTCCCACTACCATCC	ATTTGTTGGGGAAGAGGGAAG	36	403
RBM26	chr13:78877000-78877362	TTAAAAACTCTATCCCCAAAACCTC	GATTGAAGATGTAATAGGTGTTGAGG	8	363
RBM26	chr13:78878236-78878603	CTTCTCTCAACCTCNAAACCAAATAC	GGGGTTTTNGTTGTTTTTGAAGTTAG	25	368
RBM26	chr13:78877458-78877803	AAACTACCCNAATCCCCAATAAAAAC	TGGGAGATAGGNGGATTTAGAGATTT	18	346
IL2RG	chrX:70248425-70248871	ATTCTCAACCACCTTCTCCTCTA	GGGGGAGAAATTGAAGTTGATT	5	447
IL2RG	chrX:70247720-70248167	GTTTTGAAAGGTTGAGGTAGGAG	ACCCAAATTCCTAACACAAACA	5	448
IL2RG	chrX:70247285-70247682	GAAGAGGAATAGTGGGGTTAATTTG	CTCCTTCTAACCATCATTTCTCTTTC	3	398
IL2RG	chrX:70247998-70248424	CCACCAACTATAATATCTTCATTCCC	GGTGTTAGTGGTAGTGAATAGATTT	6	427
IL2RG	chrX:70248662-70249102	GAGTTGGGTTTTTGTTGAGATTG	CTTCTCCAATCACCTCTATATTTTC	4	441
IL2RG	chrX:70247017-70247428	CTACTCTATAAACTCCAATATCCCAC	GATTAGAGATTAAGAGAGAGGGTAGT	3	412
IL2RG	chrX:70247472-70247765	TAATAATGTAGAGTGAGGTTGGTAGG	CAAACTCCTAACCTCTAATAATCCTC	2	294
IL2RG	chrX:70249021-70249222	TCTAAAAACCCTCTACTCTCTAATCC	GTGAGTGTTTAGAAATATGAGGATG	2	202
FHIT	chr3:61211371-61211732	CCACCACCAACTTAAATATACCTTT	TATAGTTTTTGGTTTTGGGGGTGTA	13	362
FHIT	chr3:61212666-61213109	CCCTAACATCCTAACAAAATTACACC	GAGGTTAGGAATTGGGTTTGAATTA	7	444
FHIT	chr3:61212017-61212375	TTTAGGATGTTGATAGTTGGGAATG	TATACCCCAAACCCCCTTATAAAAA	19	359
FHIT	chr3:61211707-61212034	CTACACCCCCAAAACCAAAAA	TTGTTAATATTTTGGAAGGTAGGGG	24	328
FHIT	chr3:61211034-61211356	AAACCACCCTTAATAATCTAAACCC	GTAGGTTAGTGGAATTTGAGATGTA	4	323
FHIT	chr3:61212534-61212958	TCATTTCCCCACTCTAAATCTT	GAGATTAGGGGAGAAAGGTTATTTTAGA	8	425
FHIT	chr3:61212949-61213341	CCCTAATCTCCCTTTCTCTAATACAA	GATAGAGAAAGGAAATGGTGTTAAGG	4	393
FHIT	chr3:61211208-61211564	CAACATCCTTTAACCACTTAACCTA	GTATAGAGAAGGTAGTATTTTGGGAG	6	357
FHIT	chr3:61212118-61212378	GGAATAGAGGGTAAAAAGTTTTGTG	ATTTATACCCCAAACCCCCTTATAA	12	261
FHIT	chr3:61212492-61212705	CTATCCCTTCACNACTTCCCACTAA	GAAGGGGNGTATGTGGTGTAATTTT	5	214
FHIT	chr3:61212111-61212385	GGATTNGGGAATAGAGGGTAAAAAGT	TTATACNATTTATACCCCAAACCCCC	14	275
FHIT	chr3:61211982-61212565	CAATATTCCACTTAAACTTACCTCCC	GGAATTTAGAAAGATTTAGAGTGGGG	28	584
XAF1	chr17:6600330-6600779	GTGGGGGTGGGTAGTATTATT	TCTCCCCCTACTCTTCCTAAA	8	450
XAF1	chr17:6599580-6600029	AAATCTAAACTCACACCACCCTA	GGAGGGAGGAGATTTTTAGAATTTT	8	450
XAF1	chr17:6598992-6599381	ATTAGTTGTTAAATGAGGTGGATGG	CCAACCTCCAAACAAACTCTAAAAT	2	390
XAF1	chr17:6600024-6600394	CCCTCCCTAAAACTATAAACTAAACC	GAAAGTTTAATATTTGGGGGAAAGG	10	371
XAF1	chr17:6599297-6599600	TCTTCCCTCCTATCACTATAATCATC	GGGTGGTGTGAGTTTAGATTTAATT	3	304
XAF1	chr17:6598620-6599003	CACCTCCTAAATTCAAACAATTCTC	GATAGTTAGTTGGGGTAGTGAGTATT	9	384
XAF1	chr17:6600751-6601014	TTAATTAGTTTAGGAAGAGTAGGGGG	CTCCTTTCATTTCCATCAACTCTTA	5	264
TCF7	chr5:133479329-133479759	CTCCAAATCCTTCCCCTAAAAC	GTGTGTATGGGAGAAAAGATTAGTATAG	14	431
TCF7	chr5:133479776-133480218	AAAGGAGAATTTTGTTGAAGGAAGG	CCAACCCTTCCTAATATATCTAAAACC	10	443
TCF7	chr5:133478952-133479359	AACAAACTTCCAAAACCCCT	TAGTGTTAAGTTTTAGGGGAAGGAT	27	408
TCF7	chr5:133480199-133480574	GATATATTAGGAAGGGTTGGTAAAGG	CTCTAATAACCCCACTATAACCATAC	5	376
TCF7	chr5:133479556-133479854	CTTCAATCTACTCATACATTACCCAC	GAAGATAAAAGTTAAGAGGTAGAGGG	9	299
TCF7	chr5:133478571-133478986	TTTTTAGGATGAAGGNGAGGAGTAGG	AAAACTCACCNTCCTCCAAAAACTCT	63	416
TCF7	chr5:133478011-133478596	GNGTAGAAAGTAGGGGGAATATTTGG	CCTACTCCTCNCCTTCATCCTAAAAA	81	586
CXCR4	chr2:136590981-136591415	CCAAACTCTATCCCACAAAATACTA	GGGTTTGAGGGGGAAAATTTTT	37	435
CXCR4	chr2:136592125-136592566	GGTGGTTATTGGAGTATTTAGGTTT	CTTCCCTAAACCTCAATATCTCTACT	34	442
CXCR4	chr2:136591568-136591916	CACCCAATATCAAAAACAATCACC	GGGGGAGTAGGATTGGAATTTTT	25	349
CXCR4	chr2:136592530-136592803	GGGAATGTTATAGTAGAGATATTGAGG	CTCCAAAATTATACCAAATCCTACC	6	274
CXCR4	chr2:136591821-136592149	GGATTTAAGGGGGAGATATATGTAGT	AAACCTAAATACTCCAATAACCACC	13	329
CXCR4	chr2:136590776-136591005	AAATTTCATTTCCTCACTCTCCC	TAGTATTTTGTGGGATAGAGTTTGG	20	230
CXCR4	chr2:136591394-136591648	AAAAATTTTCCCCCTCAAACCC	TTGGGTTGAGTTTTTAGGAGGAG	18	255
HLA-DPB1	chr6:33151726-33152007	CAAAAACTCCCTTTAACNAATCCTTC	AGGGTAGGAGTTTTNGTAGTTTGTTT	8	282
HLA-DPB1	chr6:33151799-33152008	GATGGTTTTGTAGGTTTTTGNGGTTT	CTTAAAACAAAAACCCCCNCAACCTA	7	210
SESN3	chr11:94603499-94603942	CTCTCAACCTCCCCCAATAC	GGGTTTGGAAGATGGGGG	56	444
SESN3	chr11:94604246-94604695	TTAAGTAGTAGGGTAGTAGGGAATAG	TAACTCAAACATTTATCCCCTATCC	6	450
SESN3	chr11:94602968-94603394	CCCAACCTCAAAAACTAACCAA	TAAGTTTGGAGGGGTTGGGATA	17	427
SESN3	chr11:94603927-94604338	CCCATCTTCCAAACCCCC	GGTTTGGAGGGTAGTATATTTGTATATG	35	412
SESN3	chr11:94604671-94605048	GGATAGGGGATAAATGTTTGAGTTA	CTTTCCCCAATCAAATCTACCTTC	9	378
SESN3	chr11:94603232-94603638	AGTTAAATTGTATAGGGAGGAGGAT	CCAACTACCTACTCTATACCAACTA	30	407
SESN3	chr11:94602759-94602992	TTTTTCATTCCCTTCCCCATC	GATTTGGTTAGTTTTTGAGGTTGG	7	234
NKG2D	chr12:10453549-10453996	GTTGGAGGTTGAGTAGTAATGTTTA	ACCAAAACCTCATACCCTTTTA	2	448
NKG2D	chr12:10454271-10454627	GAGGGTTATTTTGGTTGTGTAAGTA	CTACACTAACATAAAACTCCTACCTC	0	357
NKG2D	chr12:10453140-10453417	CCTAACTTTAACCTCTAATTCTCAC	AGAAGTGAGTTTGGTTTAGGAT	1	278
NKG2D	chr12:10453977-10454295	AAAGGGTATGAGGTTTTGGTAAATG	TACTTACACAACCAAAATAACCCTC	1	319
NKG2D	chr12:10453454-10453902	GTGATGTTAGGGATTGTGTTTTATG	CTCCATCTTTAACNCTCAATCCTTACA	1	449
NKG2D	chr12:10452867-10453478	GGTAGTAAATTTGTAGGGAGAGAAAG	CATAAAACACAATCCCTAACATCAC	3	612
NKG2D	chr12:10454602-10455174	GAGGTAGGAGTTTTATGTTAGTGTAG	CCTATTTCTCTACTAACTCATCTCCT	3	573
IL1B	chr2:113310054-113310503	TTTAAGGTTGGAGGGATTTGTA	TCTACTCCAACTCTCCTAACCA	4	450
IL1B	chr2:113311248-113311697	GATGGATAAATGGGTATAATGAAGGG	CCCTAAACAATACCCTAAAACAAAC	3	450
IL1B	chr2:113310524-113310944	GGGTGTTAGTTGTTAGATAAGTAGT	CTCTTTTCCCCTTTCCTTTAACTTA	3	421
IL1B	chr2:113310864-113311275	TAAAAGTAGAAGTAGGAGGTTGAGA	AACCCTTCATTATACCCATTTATCC	2	412
IL1B	chr2:113309771-113310063	CTACCTCTCAAAACTACCTAAAACAC	GTTTTGGGATTTGGAGGTTATTTAG	1	293
IL1B	chr2:113311676-113311950	CCTACTCCAAAATACTACCCAAAAA	GGTAGGTGTTTGTAGTTTTAGTTGT	6	275
IL1B	chr2:113310472-113310671	AGTAATGTATTGGTTAGGAGAGTTG	CTCTCTCTCTTTCTTTCTCTATCTCT	1	200
AOAH	chr7:36730358-36730802	ATCAATTAATCTCTCTCTCCTTCTC	TGTTAAAGGGTTGTGTGTTTGT	6	445
AOAH	chr7:36729750-36730191	TTATAGTTAGTAGGAAATGGGAGAG	CAATCCAAACCCAACCTCTC	3	442
AOAH	chr7:36731019-36731367	AAATAATGGGTAGTTAGTATGGTGG	AACCTCCTACACTTACCTAAACTAT	2	349
AOAH	chr7:36731346-36731778	GTTTAGGTAAGTGTAGGAGGTTATG	CACCCCTATAATAATCCTAATAACCC	3	433
AOAH	chr7:36730668-36731051	AATTGATTTGTTGGGTTGGTTAGG	CTAAAATCCCACCATACTAACTACC	1	384
AOAH	chr7:36729989-36730385	TCTACTCTTAAACTCCACATTTCTC	GAAGAGAAGGAGAGAGAGATTAATTG	8	397
AOAH	chr7:36729678-36730013	TAAATCTCACTCACTTCAATTCACC	GAGAAATGTGGAGTTTAAGAGTAGA	1	336
CR1	chr1:205735090-205735487	AAAAACAAACCACCCCCAA	TTTTTAAGGTTGGTGGTGAGAAG	6	398
CR1	chr1:205736566-205736973	GAGTTTTTAGGTGTAGGGGTTTAAG	CACCTACATCCCTAAAACTACTTATC	15	408
CR1	chr1:205736074-205736363	GGGGAAGTTGTGGTTAAAAGTATTT	CTCTCACCCCAAACCACC	16	290
CR1	chr1:205735604-205735856	ACAAAAACTCCCCTAACTAATCTTC	GTGTGGGAAGGTTAGTTAATGAAA	5	253
CR1	chr1:205735863-205736098	GTAAAGAGGAAAAGTTAAGTAGGGTG	AAATACTTTTAACCACAACTTCCCC	10	236
CR1	chr1:205736347-205736720	GTGGTTTGGGGTGAGAGG	CCCAAATTCCCTTTCACTAAAATC	38	374
CR1	chr1:205736948-205737162	GATAAGTAGTTTTAGGGATGTAGGTG	TATCTACTATCCCTTCTACCTACAAC	5	215
CR1	chr1:205735308-205735668	ATATATCTCCTAATACTATCCCTCCC	AGTATGGAAGGTAGATTAGAATAGGG	5	361
CR1	chr1:205735640-205735871	TTACCCTATTCTAATCTACCTTCCA	TTTTTGTAAGAATGTGTGTGGGAAG	4	232
LY9	chr1:159035711-159036160	TACCCATCTAACCATCCCTCTA	ATAGAAGAGGGATTTGGAGGAGTA	0	450
LY9	chr1:159035233-159035664	CCCACCCAAAATTCCTAATAAAATC	GGTAGTAGGTTTATGAATGTTTAGGG	2	432
LY9	chr1:159036386-159036800	CTCCCTATACATCAACAATCTAACTC	AGATAGATAGTAGAGATTGAGAAGGG	1	415
LY9	chr1:159036775-159037191	CCCTTCTCAATCTCTACTATCTATCT	AGTGGAAGTAATGGGTATATATGGA	2	417
LY9	chr1:159036148-159036411	ATCCCTCTTCTATCTCTACAAAACT	GAGTTAGATTGTTGATGTATAGGGAG	5	264
LY9	chr1:159035107-159035422	CCTCTCTCCTTCCAATATCTACATAT	AGGTATTTAGGAAGTTGGTATTTGG	2	316
LY9	chr1:159035533-159035850	GAGATGTTATGGATAATAAGGGTGAG	TACTCATACCTACACCATTTTCTTC	3	318
DSC1	chr18:26995889-26996328	CCCCCTCTCTTCCCTCA	GGATTTAGGATGGAAAGTGTTTAGT	1	440
DSC1	chr18:26996334-26996783	CTCTCAACTCTTCCCTAAATCTTC	GAATTGGAAGGAAGGAGATTGG	5	450
DSC1	chr18:26997095-26997494	CTCCTCAACTACCATTAACAAATCA	GGGTGAATAGAGTGATTTTAGAGAG	2	400
DSC1	chr18:26996763-26997119	CAATCTCCTTCCTTCCAATTCAAT	TGATTTGTTAATGGTAGTTGAGGAG	3	357
DSC1	chr18:26997470-26997731	CTCTCTAAAATCACTCTATTCACCCTAA	TTTTAGTAGTATGGGTGTTGGGTTT	0	262
DSC1	chr18:26997647-26998031	TTTAATGGTAGTGATGGAAGTTAGG	CTATATTCCCATTCTTTTCTCCCAA	1	385
DSC1	chr18:26995707-26995976	AAGTAGTTATAGGATGAGAAGGTGA	ATCCTCAACTTAACTTCCACTT	1	270
DSC1	chr18:26996233-26996559	TATAGTAGGATGGAAGAGGGATTTT	TCTAATAACTCTAACCTCTACTACCC	0	327
PIK3IP1	chr22:30018826-30019264	GTGGGGAGTGGAGTAATAGTT	CAAAACCAATCTAACCAACACA	8	439
PIK3IP1	chr22:30017615-30018060	TTTGGAGGAGGAGATGGAGAG	CACTTTCTCTCTACCTTTCCTTACT	12	446
PIK3IP1	chr22:30018019-30018442	CAAACTCCATCCACTCATAAACAAA	AATAAGGGTAGGTTTGATTGTAAGG	11	424
PIK3IP1	chr22:30018533-30018947	CCCTAAATCCTAAACCTCCTAAATC	GGTAGGTGGTTGTAGTGAGT	7	415
PIK3IP1	chr22:30019133-30019515	AGTAAATTGAGAGAGAGAGTAGAGTG	CCTACTATATACAACACCCCAAAAA	8	383
PIK3IP1	chr22:30017373-30017625	GTTGAATTTTAGTTTGGTTAGGGGA	CCTCCTCCAAAATAATCACAAATTC	8	253
PIK3IP1	chr22:30018254-30018557	TAATCTCACCTCCAAATCCATAAAC	GATTTAGGAGGTTTAGGATTTAGGG	9	304
ITGA6	chr2:173000945-173001394	CTATAAATTCCCAAACCCTTCCC	GTGAGTTTGGGAAAGGTTTAGATTA	43	450
ITGA6	chr2:172999583-173000029	GTGTTAAATGTTAGAGGTTGGTGAA	CCTCAATTCATCCTAACAATCCTAT	12	447
ITGA6	chr2:172999873-173000287	CACTTTAAACAACCCATCCTTAACT	GTTATAAAGAGAAGTGTAGGTGATG	10	415
ITGA6	chr2:173001370-173001634	TAATCTAAACCTTTCCCAAACTCAC	GTATTTTGGGGGTTGGGTATATTAT	10	265
ITGA6	chr2:173000121-173000343	CAATCTACACAACTATAATCCCCAA	TTGTGGATAGAATTGTGGTTGT	8	223
ITGA6	chr2:172999258-172999707	CCCCTTTAACAAACTACTAAAAACC	TAGGGGTAATTTTATTTTGTAGGGG	4	450
ITGA6	chr2:173000320-173000749	CNACAACCACAATTCTATCCACAAAA	GAGGGGAGNGGGGATTTGTAG	56	430
ITGA6	chr2:173000654-173000957	GAGAGGAGGNGAAGGTGGTTG	TCTAAAAACTCACAACCNCTTATCCTC	29	304
JUN	chr1:59022219-59022652	GTTGGTTGGTTGTGTTTGTTTG	TCACTAAACAATCAAACCCCAA	26	434
JUN	chr1:59022862-59023259	GGGTTGGAGGTTGAGAATTTAA	CCATCTAAACCCTATTACCCACC	28	398
JUN	chr1:59021913-59022182	GTAGGAAAGGTTTGTAAAAGTTGGT	TTCTTTTCACCTTCTCTCTAACTAC	19	270
JUN	chr1:59022628-59022886	GTTTTGGGGTTTGATTGTTTAGTG	TACTTAAATTCTCAACCTCCAACC	21	259
JUN	chr1:59023231-59023649	GTAATTGGTGGGTAATAGGGTTTAG	AAATTCTTTCCACCACACACTTTC	35	419
JUN	chr1:59022097-59022317	AAAAACCAAACTCTCTAAACACTCC	GGATAAGGGTTTAGAGTTGTATTGAG	9	221
JUN	chr1:59021177-59021563	ATACNACTTCAAACTCCCCACTAAAT	GATAAGTAAGAGTGNGGGAGGTATTT	29	387
JUN	chr1:59021516-59021941	AGGGAGNGTAGGGTTAATTAAGATGT	CNAAACCAACTTTTACAAACCTTTCC	50	426
HLA-DRA	chr6:32514479-32514714	GAGGGAAGGAATATTAAAGTNGTTTTGTG	CTAAAATTACAAACNCCCACCACCAT	8	236
HLA-DRA	chr6:32516346-32517043	GGAGGGAAGGTATGTTGATATGA	CCTCCCNAATTCAAACAATCCTC	13	698
FOS	chr14:74814406-74814750	TTCCTTAATATTCCCACACATAACC	GAAGATAGTTTTGAGGTTTAGAGATAGG	14	345
FOS	chr14:74815674-74816112	TTTTTGTGTTTGGAGGGAGGTT	ATCCCTTCAACATCACTTACTT	27	439
FOS	chr14:74814720-74814978	TCTCCTATCTCTAAACCTCAAAACT	AATATGGATATTTTGTGTAAGGGGG	17	259
FOS	chr14:74815983-74816427	GGGTGTGTAAGGTAGTTTTATTGAT	AACTACACCAACCACTACAAATC	25	445
FOS	chr14:74815512-74815826	AAATAACCTCTCTTACTACCACTCA	GGAGTGTAGATTAGAGGTTGTTTAG	25	315
FOS	chr14:74814000-74814430	TAACACACTCTAAAACACCTTACC	GGTTATGTGTGGGAATATTAAGGAA	23	431
FOS	chr14:74814994-74815374	ACAAATTTCCACNACCTTTCCCTATA	GTTGGGTAGGAGTANGGTTATTGTT	36	381
FOS	chr14:74815351-74815572	ACAATAACCNTACTCCTACCCAACTC	GATAGGNGAGTTTATGTTGGAGAAGG	19	222
FOS	chr14:74814720-74815019	TCTCCTATCTCTAAACCTCAAAACT	TATAGGGAAAGGTNGTGGAAATTTGT	19	300
CYBB	chrX:37523861-37524283	CCAACCTATCAAAATCACACCTATT	TTTTTATGGTGGTAGAGGTTGAATG	2	423
CYBB	chrX:37523504-37523885	AAATTAATCCCAAACTCCTAACCTC	AATAGGTGTGATTTTGATAGGTTGG	2	382
CYBB	chrX:37524492-37524739	TGGAAAGAATATATTTGGGGGT	CCTACTTCCCATACATAAATCAATC	2	248
CYBB	chrX:37524266-37524513	TTTGTTATTATGGGGAATTGGGTTG	ACCCCCAAATATATTCTTTCCA	1	248
CYBB	chrX:37523140-37523384	CACCAACATTACCACAAACACATAA	AGTTAGGTTGTAGTGAGTNGAGATTG	2	245
CYBB	chrX:37523391-37523885	TTCAAATAATTCTCCTACCTCAACC	AATAGGTGTGATTTTGATAGGTTGG	3	495
CYBB	chrX:37522798-37523396	CATTAACCTAAACCCACACAAAATC	TTTGAATTTGGGAGTTAGGTTGTAG	2	599
CYBB	chrX:37524715-37525657	GATTGATTTATGTATGGGAAGTAGG	CAATTCTCTACCTTCAACTCCATAA	5	943
DUSP1	chr5:172130542-172130804	AAATACCCACTTCCATAACCATAAC	GAAGGATATTTGGGTTGTGTGT	26	263
DUSP1	chr5:172131357-172131806	CTTACCCAAAACCACACTACTAAAA	GAAGTTTAGTTTGGAGTTAAGGTGA	23	450
DUSP1	chr5:172129706-172130008	CTAACACTACTCTTCCATACCTTTAC	AATTTTTAGTTTTTGGTGGGTGGG	11	303
DUSP1	chr5:172131276-172131621	TACATACTCTTATACCCCTTTTCCTC	GGGGGTTATAAGATTAGGAATAGTA	12	346
DUSP1	chr5:172131597-172131812	TACTATTCCTAATCTTATAACCCCC	GATGGAGAAGTTTAGTTTGGAGTTA	15	216
DUSP1	chr5:172130781-172131192	NCACACACAACCCAAATATC	GGNGAGGTTAAGGTAGGTGGTA	49	412
DUSP1	chr5:172130070-172130501	CCAAAAATAAATATACTCCAACNCCCAC	GGNGTAATGTTTGTTGTTGGATTGT	57	432
DUSP1	chr5:172131110-172131403	GGTTNGTTGTTAGTTGAGGTTGATTT	TTAAACNCCTATTTACTACCCCCACC	20	294
DUSP1	chr5:172129940-172130389	TTTCCCCATTAATAACACCNAAACAC	GTTATGGGTTTGGAGTATATNGTGTT	46	450
DUSP1	chr5:172130466-172130709	GAAGGAGNGGTAGTTTAGTAGTAGGT	CCTCTCTCAATCCAAAAACNACTTTT	20	244
LYZ	chr12:68027608-68027976	CATCCTAACCACATAATAAAACCCT	GTGTTTGTTGTTTTAATGGGTG	3	369
LYZ	chr12:68028662-68029111	AAGAAGGGGTTTTGAGTGAATAGAT	ATACCACTACACTCCAACCTAAA	3	450
LYZ	chr12:68028353-68028664	GGGTGGAGTTTTTAAATTATAAGGGG	CTTCTTCTTCCTTCTCTCCTAATATC	2	312
LYZ	chr12:68029113-68029544	TAATCTCAACTCACTACAACCTCTA	GGTATATTTTGAATTGTGTGGGAGA	2	432
LYZ	chr12:68027955-68028222	CACCCATTAAAACAACAAACAC	AAGTATTGGTTTTGGAAGAATTGGG	0	268
LYZ	chr12:68027405-68027675	TAGTTGGATATATGTTTGGGTAGGT	CATATACCACCATACCCAACTAATT	5	271
LYZ	chr12:68028190-68028448	TACTATACCCCAATTCTTCCAAAAC	TAGGTTAGAGTGTTAGGTTGATTAGG	0	259
LYZ	chr12:68027107-68027622	CATAAACCACTACACCTAACCCT	TATGTGGTTAGGATGGTTTGGATTT	5	516
