# Supplementary material for: Application of microdroplet PCR for large-scale targeted bisulfite sequencing
Source: HighWire-hosted journal article supplement (doi:10.1101/gr.116863.110), 2011-07-14
Supplement: Supplemental_Table_3.xlsx [file Supplemental_Table_3.xlsx]

## Sheet: Sheet1
Condition	Value
Minimum Primer Length	15 bp
Maximum Primer Length	36 bp
Optimal Primer Length	26 bp
Minimum Primer Tm	56 C
Maximum Primer Tm	60 C
Optimal Primer Tm	58 C
Thermodynamic Parameters and Salt Correction	SantaLucia J Jr. A unified view of polymer, dumbbell, and oligonucleotide DNA nearest-neighbor thermodynamics. Proc Natl Acad Sci U S A. 1998 Feb 17;95(4):1460-5.
Monovalent Salt Concentration	50 mM
Divalent Salt Concentration	2 mM
DNTP Concentration	0.2 mM
Maximum Self Complementarity	46 C
Maximum Primer Pair Complementarity	46 C
Maximum Self End Complementarity	46 C
Maximum Hairpin Stability	46 C
Maximum Primer GC Content	0.65
Minimum Primer GC Content	0.35
Minimum Primer 3' Distance	3 bp
Primer Task	Pick Detection Primers
Primer Maximum Ns Accepted	Variable
Number of Primers Returned	Length of Target Sequence
Amplicon Size Range	200-Variable
Optimum Amplicon Size	Maximum Amplicon Size
